# Supplementary material for: Paediatric trainees and end-of-life care: a needs assessment for a formal educational intervention
Source: Springer Nature journal article supplement (doi:10.1007/s40037-015-0161-4), 2015-02-02
Supplement: MOESM1 [file 14997550]

## End-of-Life Education

### 1. What type of practitioner are you?

#### Answer Options

Pediatric Resident  
Med-Peds Resident  
Ped Neurology Fellow  
Ped Critical Care Fellow  
Ped Pulmonology Fellow  
Ped Heme/Onc Fellow  
Ped Endocrinology Fellow  
Developmental Ped Fellow  
Neonatology Fellow  
Ped Gastroenterology Fellow  
Ped Emergency Medicine Fellow  
Ped Infectious Disease Fellow  
Ped Rheumatology Fellow  
General Pediatric Attending  
Pediatric Critical Care Attending (NICU or PICU)  
Pediatric Emergency Medicine Attending  
Pediatric Hematology/Oncology Attending  
Other Pediatric Subspecialty Attending

### 2. What is your PGY level?

#### Answer Options

PGY-1 (start date June 2013)  
PGY-1  
PGY-2  
PGY-3  
PGY-4  
PGY-5  
PGY-6

Attending Physician  
Other (please specify)

### 3. Does your training program include any formal end-of-life educational curriculum?

#### Answer Options

Yes

No

4. How old are you (in years)?

Answer Options

5. What is your gender?

Answer Options

Female

Male

6. Have you had any previous formal training in end-of-life issues or related topics?

Answer Options

Yes

No

If yes, where? (please specify)

7. Have you ever had to discuss a poor prognosis (give "bad news") to a patient and/or family?

Answer Options

Yes, over 20 times

10-20 times

5-10 times

1-5 times

Never

8. Rate how much you agree with the following statement: "I feel comfortable discussing a poor prognosis (giving "bad news") to a patient and/or his family."

**Answer Options**

- Strongly Agree
- Agree
- Unsure
- Disagree
- Strongly Disagree

**9. Have you ever had to discuss “goals of care” with a patient and/or family?**

**Answer Options**

- Yes, over 20 times
- 10-20 times
- 5-10 times
- 1-5 times
- Never

**10. Rate how much you agree with the following statement: "I feel comfortable discussing “goals of care” with a patient and/or family."**

**Answer Options**

- Strongly Agree
- Agree
- Unsure
- Disagree
- Strongly Disagree

**11. Have you ever had to discuss advance directives with a patient and/or family?**

**Answer Options**

- Yes, over 20 times
- 10-20 times
- 5-10 times
- 1-5 times
- Never

**12. Rate how much you agree with the following statement: "I feel comfortable discussing advance directives with a patient and/or family."**

**Answer Options**

- Strongly Agree
- Agree
- Unsure
- Disagree
- Strongly Disagree

**13. Have you ever had to discuss a do not resuscitate (DNR) order with the family of a dying patient?**

**Answer Options**

- Yes, over 20 times
- 10-20 times
- 5-10 times
- 1-5 times
- Never

**14. Rate how much you agree with the following statement: "I feel comfortable discussing DNR orders with a patient and/or family."**

**Answer Options**

- Strongly Agree
- Agree
- Unsure
- Disagree
- Strongly Disagree

**15. Have you ever had to manage pain control, nausea and fatigue medications of dying patients?**

**Answer Options**

- Yes, over 20 times
- 10-20 times
- 5-10 times
- 1-5 times
- Never

16. Rate how much you agree with the following statement: "I feel comfortable managing pain control, nausea and fatigue medications of dying patients."

Answer Options

Strongly Agree  
Agree  
Unsure  
Disagree  
Strongly Disagree

17. Have you ever taken care of a dying patient whose family insisted on continuing to "do everything" despite a grim prognosis?

Answer Options

Yes, over 20 times  
10-20 times  
5-10 times  
1-5 times  
Never

18. Rate how much you agree with the following statement: "I feel comfortable taking care of a dying patient whose family insists on continuing to "do everything" despite a grim prognosis."

Answer Options

Strongly agree  
Agree  
Unsure  
Disagree  
Strongly Disagree

19. Have you ever had to discuss withdrawal of care with the family of a dying patient?

Answer Options

Yes, over 20 times  
10-20 times  
5-10 times  
1-5 times  
Never

20. Rate how much you agree with the following statement: "I feel comfortable discussing withdrawal of care with the family of a dying patient."

Answer Options

- Strongly Agree
- Agree
- Unsure
- Disagree
- Strongly Disagree

21. Have you ever been present with a family during the withdrawal of care on a patient?

Answer Options

- Yes, over 20 times
- 10-20 times
- 5-10 times
- 1-5 times
- Never

22. Rate how much you agree with the following statement: "I feel comfortable being present with a family during withdrawal of care on a patient."

Answer Options

- Strongly Agree
- Agree
- Unsure
- Disagree
- Strongly Disagree

23. Have you ever declared a patient dead?

Answer Options

- Yes, over 20 times
- 10-20 times
- 5-10 times
- 1-5 times
- Never

24. Rate how much you agree with the following statement: "I feel comfortable declaring a patient dead."

Answer Options

- Strongly Agree
- Agree
- Unsure
- Disagree
- Strongly Disagree

25. Have you ever had to discuss autopsy options with a family?

Answer Options

- Yes, over 20 times
- 10-20 times
- 5-10 times
- 1-5 times
- Never

26. Rate how much you agree with the following statement: "I feel comfortable discussing autopsy options with a family."

Answer Options

- Strongly Agree
- Agree
- Unsure
- Disagree
- Strongly Disagree

27. Do you feel that you have effective personal coping mechanisms to deal with the death of your patients?

Answer Options

- Yes
- No
- If yes, can you give some examples of how you handle deaths?

**28. Do you feel that there are effective hospital-based support services to help clinicians deal with the death of their patients?**

**Answer Options**

Yes

No

**29. What are some areas that you feel you may benefit from either attending sessions on or having more formal education in? (check all that apply)**

**Answer Options**

Physician Bereavement

Family Bereavement

Talking to families about withdrawal of care and/or DNR

Communicating with families during and after the dying

Laws regarding withdrawal of care, surrogate decision-

Meanings and specifics of DNR orders

Dealing with the family who continues to insist that they want

Managing pain, nausea, fatigue and other palliative

Other Suggestions (please specify)
